# Supplementary material
Source: PubMed Central journal article supplement (PMC5533552)
Supplement: JSLHR-60-393-s001.pdf [file JSLHR-60-393-s001.pdf]

**Supplemental Material S1.** Correlations between language, speech, and motor variables for all participants.

| Measure         | 1    | 2    | 3    | 4    | 5    | 6    | 7    | 8    | 9    | 10   |
|-----------------|------|------|------|------|------|------|------|------|------|------|
| 1 SPELT-P2/3    |      |      |      |      |      |      |      |      |      |      |
| 2 BBTOP CI      | .80* |      |      |      |      |      |      |      |      |      |
| 3 PPVT-4        | .57* | .42* |      |      |      |      |      |      |      |      |
| 4 EVT-2         | .53* | .45* | .69* |      |      |      |      |      |      |      |
| 5 MABC-2 MD     | .35  | .26  | .19  | .24  |      |      |      |      |      |      |
| 6 MABC-2 AC     | -.07 | -.13 | .08  | -.04 | .22  |      |      |      |      |      |
| 7 MABC-2 BAL    | .35  | .32  | .19  | .31  | .48* | .31  |      |      |      |      |
| 8 Tap CV (%)    | -.11 | -.01 | .14  | .13  | -.21 | -.18 | -.07 |      |      |      |
| 9 Clap CV (%)   | -.31 | -.21 | -.12 | -.36 | -.31 | -.17 | -.37 | .26  |      |      |
| 10 Tap CD (ms)  | .40  | .46* | .34  | .24  | .09  | .30  | .41* | .07  | -.20 |      |
| 11 Clap CD (ms) | .22  | .35  | .16  | .17  | -.08 | .17  | -.03 | -.07 | -.17 | .49* |

*Note.* SPELT-P2/3 = Structured Photographic Expressive Language Test–Preschool 2/Third Edition; BBTOP CI = Bankson–Bernthal Test of Phonology Consonant Inventory, to calculate the mean and SD, scores <65 were calculated as 65 (12 of 27 children scored <65); PPVT-4 = Peabody Picture Vocabulary Test–Fourth Edition; EVT-2 = Expressive Vocabulary Test–Second Edition; MABC-2 = Movement Assessment Battery for Children–Second Edition; MABC-2 MD = Movement Assessment Battery for Children–Second Edition Manual Dexterity; MABC-2 AC = Movement Assessment Battery for Children–Second Edition Aiming & Catching; MABC-2 BAL = Movement Assessment Battery for Children–Second Edition Balance; CD = cycle duration. \* $p < .005$ .
