# Supplementary material
Source: PubMed Central journal article supplement (PMC5533552)
Supplement: JSLHR-60-393-s002.pdf [file JSLHR-60-393-s002.pdf]

**Supplemental Material S2.** Correlations between language, speech, and motor variables for the specific language impairment (SLI) group.

| Measure         | 1    | 2    | 3    | 4    | 5    | 6    | 7    | 8   | 9    | 10  |
|-----------------|------|------|------|------|------|------|------|-----|------|-----|
| 1 SPELT-P2/3    |      |      |      |      |      |      |      |     |      |     |
| 2 BBTOP CI      | .46  |      |      |      |      |      |      |     |      |     |
| 3 PPVT-4        | .08  | -.17 |      |      |      |      |      |     |      |     |
| 4 EVT-2         | -.18 | -.04 | .47  |      |      |      |      |     |      |     |
| 5 MABC-2 MD     | -.21 | -.21 | -.03 | .03  |      |      |      |     |      |     |
| 6 MABC-2 AC     | -.12 | -.24 | .25  | .18  | .49  |      |      |     |      |     |
| 7 MABC-2 BAL    | .01  | -.23 | .00  | .08  | .55* | .47  |      |     |      |     |
| 8 Tap CV (%)    | .09  | .07  | .14  | .20  | -.13 | -.11 | .11  |     |      |     |
| 9 Clap CV (%)   | .04  | .29  | .11  | -.31 | -.25 | -.33 | -.38 | .28 |      |     |
| 10 Tap CD (ms)  | .20  | .19  | .16  | -.05 | .06  | .20  | .36  | .13 | -.07 |     |
| 11 Clap CD (ms) | .10  | .54* | .08  | .20  | -.34 | -.09 | -.27 | .11 | -.06 | .29 |

*Note.* SPELT-P2/3 = Structured Photographic Expressive Language Test–Preschool 2/Third Edition; BBTOP CI = Bankson–Berntal Test of Phonology Consonant Inventory, to calculate the mean and SD, scores <65 were calculated as 65 (12 of 27 children scored <65); PPVT-4 = Peabody Picture Vocabulary Test–Fourth Edition; EVT-2 = Expressive Vocabulary Test–Second Edition; MABC-2 = Movement Assessment Battery for Children–Second Edition; MABC-2 MD = Movement Assessment Battery for Children–Second Edition Manual Dexterity; MABC-2 AC = Movement Assessment Battery for Children–Second Edition Aiming & Catching; MABC-2 BAL = Movement Assessment Battery for Children–Second Edition Balance; CD = cycle duration. \* $p < .005$ .
